# Supplementary material for: Comparing de novo assemblers for 454 transcriptome data
Source: Springer Nature journal article supplement (doi:10.1186/1471-2164-11-571), 2010-10-16

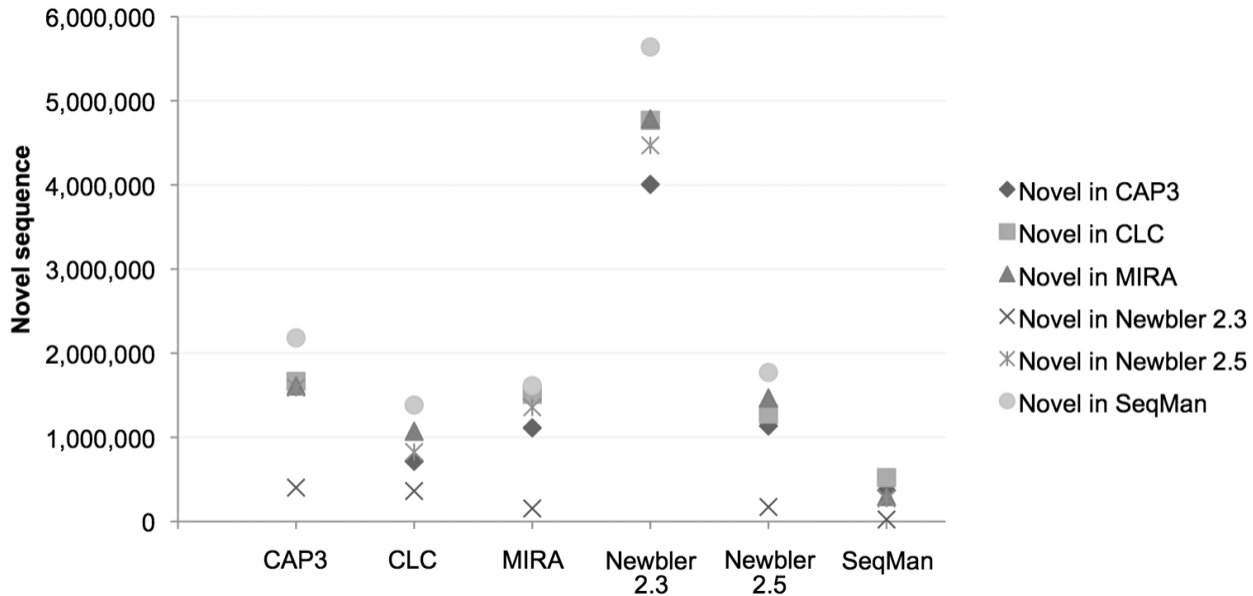

Supplement: 12864_2010_9967_MOESM4_ESM.pdf [file 12864_2010_9967_MOESM4_ESM.pdf]
